# Supplementary material for: Prognostic Values of the Gray‐to‐White Matter Ratio on Brain Computed Tomography Images for Neurological Outcomes after Cardiac Arrest: A Meta‐Analysis
Source: Hindawi journal article supplement (doi:10.1155/2020/7949516), 2020-01-01
Supplement: f1 [file 7949516.f1.pdf]

306 **Supplementary Fig 1.** Methodological quality summary.

|                   | <u>Risk of Bias</u> |            |                    |                 | <u>Applicability Concerns</u> |            |                    |
|-------------------|---------------------|------------|--------------------|-----------------|-------------------------------|------------|--------------------|
|                   | Patient Selection   | Index Test | Reference Standard | Flow and Timing | Patient Selection             | Index Test | Reference Standard |
| Chea 2016         | ?                   | ●          | +                  | +               | +                             | +          | +                  |
| Choi 2008         | ?                   | +          | +                  | +               | +                             | +          | +                  |
| Cristia 2014      | +                   | ●          | +                  | +               | +                             | +          | +                  |
| Gentsch 2015      | ?                   | +          | +                  | +               | +                             | +          | +                  |
| Hanning 2016      | +                   | ●          | +                  | +               | +                             | +          | +                  |
| Inamasu 2011      | ?                   | +          | +                  | +               | +                             | +          | +                  |
| Jeon 2017         | ?                   | +          | +                  | +               | +                             | +          | +                  |
| Kim 2013          | ?                   | ●          | +                  | +               | +                             | +          | +                  |
| Kim 2014          | +                   | +          | +                  | +               | +                             | +          | +                  |
| Lee 2013          | ?                   | +          | +                  | +               | +                             | +          | +                  |
| Lee 2015          | ?                   | ●          | +                  | +               | +                             | +          | +                  |
| Lee 2016          | ?                   | +          | +                  | +               | +                             | +          | +                  |
| Lee 2018          | ?                   | ●          | +                  | +               | +                             | +          | +                  |
| Lee 2017          | ?                   | ●          | +                  | +               | +                             | +          | +                  |
| Lee 2016          | ?                   | +          | +                  | +               | +                             | +          | +                  |
| Liu 2017          | ?                   | ●          | +                  | +               | +                             | +          | +                  |
| Metter 2011       | ?                   | ●          | +                  | +               | +                             | +          | +                  |
| Ryu 2017          | ?                   | ●          | +                  | +               | +                             | +          | +                  |
| Scarpino 2019     | +                   | +          | +                  | +               | +                             | +          | +                  |
| Son 2020          | ?                   | +          | +                  | +               | +                             | +          | +                  |
| Streitberger 2019 | ?                   | ●          | +                  | +               | +                             | +          | +                  |
| Torbey 2000       | +                   | +          | +                  | +               | ●                             | +          | +                  |
| Wang 2018         | ?                   | ●          | +                  | +               | +                             | +          | +                  |
| Youn 2017         | +                   | ●          | +                  | +               | +                             | +          | +                  |

  

|        |           |       |
|--------|-----------|-------|
| ● High | ? Unclear | + Low |
|--------|-----------|-------|

307

309
